# Supplementary material
Source: PubMed Central journal article supplement (PMC6516071)

RECURSIVE PARTITIONING OF MARIJUANA OUTCOMES

Supplemental Table 1. *Demographics.*

|                                  | Total  | CSU    | ODU    | UNM    | AU     | UCLA   | UB     | KU     | NDSU   | UH     | UWy    | UWa    |
|----------------------------------|--------|--------|--------|--------|--------|--------|--------|--------|--------|--------|--------|--------|
| <b>Gender</b>                    |        |        |        |        |        |        |        |        |        |        |        |        |
| Male                             | 31.69% | 29.45% | 25.91% | 31.07% | 27.49% | 23.41% | 51.67% | 44.20% | 43.56% | 21.63% | 33.00% | 41.76% |
| Female                           | 66.88% | 68.90% | 71.87% | 68.21% | 52.80% | 74.92% | 47.49% | 53.62% | 55.68% | 76.77% | 65.22% | 57.71% |
| Transgender                      | 0.23%  | 0.47%  | 0.36%  | 0.00%  | 0.36%  | 0.33%  | 0.84%  | 0.36%  | 0.13%  | 0.08%  | 0.00%  | 0.00%  |
| Other                            | 0.27%  | 0.24%  | 0.21%  | 0.09%  | 0.36%  | 0.33%  | 0.00%  | 1.09%  | 0.25%  | 0.30%  | 0.40%  | 0.36%  |
| Missing                          | 0.92%  | 0.94%  | 1.65%  | 0.63%  | 0.90%  | 1.00%  | 0.00%  | 0.72%  | 0.38%  | 1.22%  | 1.38%  | 0.18%  |
| <b>Race/Ethnicity</b>            |        |        |        |        |        |        |        |        |        |        |        |        |
| American Indian/Alaska Native    | 3.10%  | 2.71%  | 3.08%  | 6.34%  | 2.71%  | 2.01%  | 2.30%  | 3.99%  | 2.53%  | 1.83%  | 3.16%  | 2.15%  |
| Asian                            | 15.50% | 5.42%  | 6.44%  | 8.04%  | 3.44%  | 46.82% | 32.85% | 11.96% | 2.90%  | 29.09% | 3.36%  | 47.49% |
| Black/African American           | 12.05% | 4.24%  | 37.80% | 4.20%  | 8.50%  | 3.68%  | 9.00%  | 3.99%  | 4.17%  | 14.32% | 3.36%  | 3.58%  |
| Native Hawaiian/Pacific Islander | 1.30%  | 0.82%  | 1.57%  | 1.70%  | 0.90%  | 1.67%  | 0.84%  | 1.09%  | 0.63%  | 0.91%  | 2.57%  | 1.97%  |
| White                            | 64.66% | 86.22% | 54.69% | 63.57% | 87.70% | 34.78% | 54.39% | 81.16% | 92.17% | 40.44% | 87.55% | 50.00% |
| Other                            | 9.30%  | 4.12%  | 5.44%  | 24.73% | 0.72%  | 17.39% | 6.49%  | 5.43%  | 1.14%  | 15.61% | 4.35%  | 5.56%  |
| <b>Ethnicity</b>                 |        |        |        |        |        |        |        |        |        |        |        |        |
| Not Hispanic/Latino              | 80.89% | 86.34% | 89.62% | 46.79% | 96.38% | 76.59% | 93.51% | 92.03% | 96.84% | 67.33% | 88.14% | 92.47% |
| Yes, Mexican                     | 11.74% | 9.42%  | 1.72%  | 34.64% | 1.27%  | 18.39% | 0.63%  | 3.26%  | 1.77%  | 23.46% | 11.86% | 5.02%  |
| Yes, Cuban                       | 0.27%  | 0.35%  | 0.43%  | 0.45%  | 0.36%  | 0.00%  | 0.42%  | 0.00%  | 0.00%  | 0.30%  | 0.00%  | 0.00%  |
| Yes, Puerto Rican                | 1.04%  | 0.59%  | 2.58%  | 1.52%  | 0.36%  | 0.00%  | 1.67%  | 0.36%  | 0.51%  | 0.76%  | 0.40%  | 0.00%  |
| Yes, Other                       | 4.99%  | 2.24%  | 4.08%  | 15.54% | 0.54%  | 4.35%  | 3.77%  | 3.26%  | 0.38%  | 6.63%  | 2.17%  | 2.15%  |
| Missing                          | 1.07%  | 1.06%  | 1.57%  | 1.07%  | 1.08%  | 0.67%  | 0.00%  | 1.09%  | 0.51%  | 1.52%  | 1.38%  | 0.36%  |
| <b>Marital Status</b>            |        |        |        |        |        |        |        |        |        |        |        |        |

## RECURSIVE PARTITIONING OF MARIJUANA OUTCOMES

28

|                                |        |        |        |        |        |        |        |        |        |        |        |        |
|--------------------------------|--------|--------|--------|--------|--------|--------|--------|--------|--------|--------|--------|--------|
| Never Married                  | 93.80% | 96.11% | 85.76% | 93.66% | 97.29% | 97.99% | 99.16% | 97.83% | 97.60% | 90.48% | 95.65% | 99.10% |
| Married                        | 4.02%  | 1.77%  | 9.95%  | 3.66%  | 1.08%  | 0.67%  | 0.42%  | 1.45%  | 1.52%  | 6.55%  | 3.36%  | 0.54%  |
| Separated                      | 0.22%  | 0.00%  | 0.72%  | 0.09%  | 0.18%  | 0.00%  | 0.00%  | 0.00%  | 0.13%  | 0.38%  | 0.00%  | 0.00%  |
| Divorced                       | 0.98%  | 1.18%  | 1.93%  | 1.43%  | 0.54%  | 0.67%  | 0.21%  | 0.00%  | 0.25%  | 1.45%  | 0.00%  | 0.00%  |
| Widowed                        | 0.06%  | 0.24%  | 0.07%  | 0.09%  | 0.18%  | 0.00%  | 0.00%  | 0.00%  | 0.00%  | 0.00%  | 0.00%  | 0.00%  |
| Missing                        | 0.92%  | 0.71%  | 1.57%  | 10.80% | 0.72%  | 0.67%  | 0.21%  | 0.72%  | 0.51%  | 1.14%  | 0.99%  | 0.36%  |
| Sexual Orientation             |        |        |        |        |        |        |        |        |        |        |        |        |
| Exclusively heterosexual       | 83.34% | 83.04% | 81.53% | 78.84% | 87.34% | 75.59% | 85.36% | 84.06% | 91.54% | 81.04% | 89.33% | 83.87% |
| Mostly heterosexual            | 9.86%  | 11.19% | 10.88% | 11.43% | 7.23%  | 16.39% | 7.74%  | 7.97%  | 5.30%  | 11.20% | 6.72%  | 10.22% |
| Equally hetero- and homosexual | 2.96%  | 3.30%  | 2.93%  | 4.38%  | 2.17%  | 3.68%  | 2.93%  | 3.99%  | 0.63%  | 3.81%  | 0.59%  | 3.05%  |
| Mostly homosexual              | 1.11%  | 0.71%  | 1.22%  | 1.79%  | 0.72%  | 1.00%  | 1.67%  | 1.81%  | 0.63%  | 0.99%  | 0.59%  | 1.08%  |
| Exclusively homosexual         | 1.78%  | 1.06%  | 1.43%  | 2.32%  | 1.27%  | 2.68%  | 2.09%  | 1.45%  | 1.39%  | 1.75%  | 1.38%  | 1.79%  |
| Missing                        | 0.95%  | 0.71%  | 1.29%  | 1.25%  | 1.27%  | 0.67%  | 0.21%  | 0.72%  | 0.51%  | 1.22%  | 1.38%  | 0.00%  |
| Political Views                |        |        |        |        |        |        |        |        |        |        |        |        |
| Strongly conservative          | 6.26%  | 5.30%  | 5.44%  | 6.43%  | 14.47% | 2.01%  | 3.77%  | 7.25%  | 10.10% | 3.81%  | 10.67% | 1.61%  |
| Moderately conservative        | 11.37% | 10.95% | 8.59%  | 8.57%  | 23.87% | 5.35%  | 9.21%  | 18.48% | 18.18% | 7.39%  | 20.36% | 5.38%  |
| Somewhat conservative          | 8.68%  | 9.19%  | 7.73%  | 8.21%  | 12.48% | 7.69%  | 7.53%  | 9.42%  | 8.59%  | 7.54%  | 12.06% | 8.42%  |
| Moderate (middle-of-the-road)  | 39.75% | 38.63% | 46.17% | 41.70% | 28.57% | 36.45% | 43.93% | 30.80% | 41.67% | 40.59% | 34.78% | 34.95% |
| Somewhat liberal               | 9.83%  | 10.13% | 7.73%  | 9.20%  | 8.14%  | 11.04% | 10.88% | 10.87% | 7.32%  | 12.95% | 7.31%  | 13.98% |
| Moderately liberal             | 15.51% | 16.25% | 14.46% | 15.36% | 7.41%  | 27.42% | 16.74% | 15.58% | 9.22%  | 18.81% | 8.70%  | 25.27% |
| Strongly liberal               | 7.09%  | 7.77%  | 7.52%  | 8.93%  | 3.98%  | 8.70%  | 6.90%  | 6.88%  | 3.91%  | 7.24%  | 4.55%  | 10.22% |
| Missing                        | 1.50%  | 1.77%  | 2.36%  | 1.61%  | 1.08%  | 1.34%  | 1.05%  | 0.72%  | 1.01%  | 1.68%  | 1.58%  | 0.18%  |
| Total Sample Size              | 8141   | 849    | 1397   | 1120   | 553    | 299    | 478    | 276    | 792    | 1313   | 506    | 558    |

## RECURSIVE PARTITIONING OF MARIJUANA OUTCOMES

29

*Note.* Race/ethnicity were assessed with separate checkbox items (i.e., could select multiple options). CSU = Colorado State University, ODU = Old Dominion University, UNM = University of New Mexico, AU = Auburn University, UCLA = University of California, Los Angeles, UB = University at Buffalo, KU = University of Kansas, NDSU = North Dakota State University, UH = University of Houston, UWy = University of Wyoming, UWa = University of Washington.

RECURSIVE PARTITIONING OF MARIJUANA OUTCOMES

Supplemental Figures

Figure A.

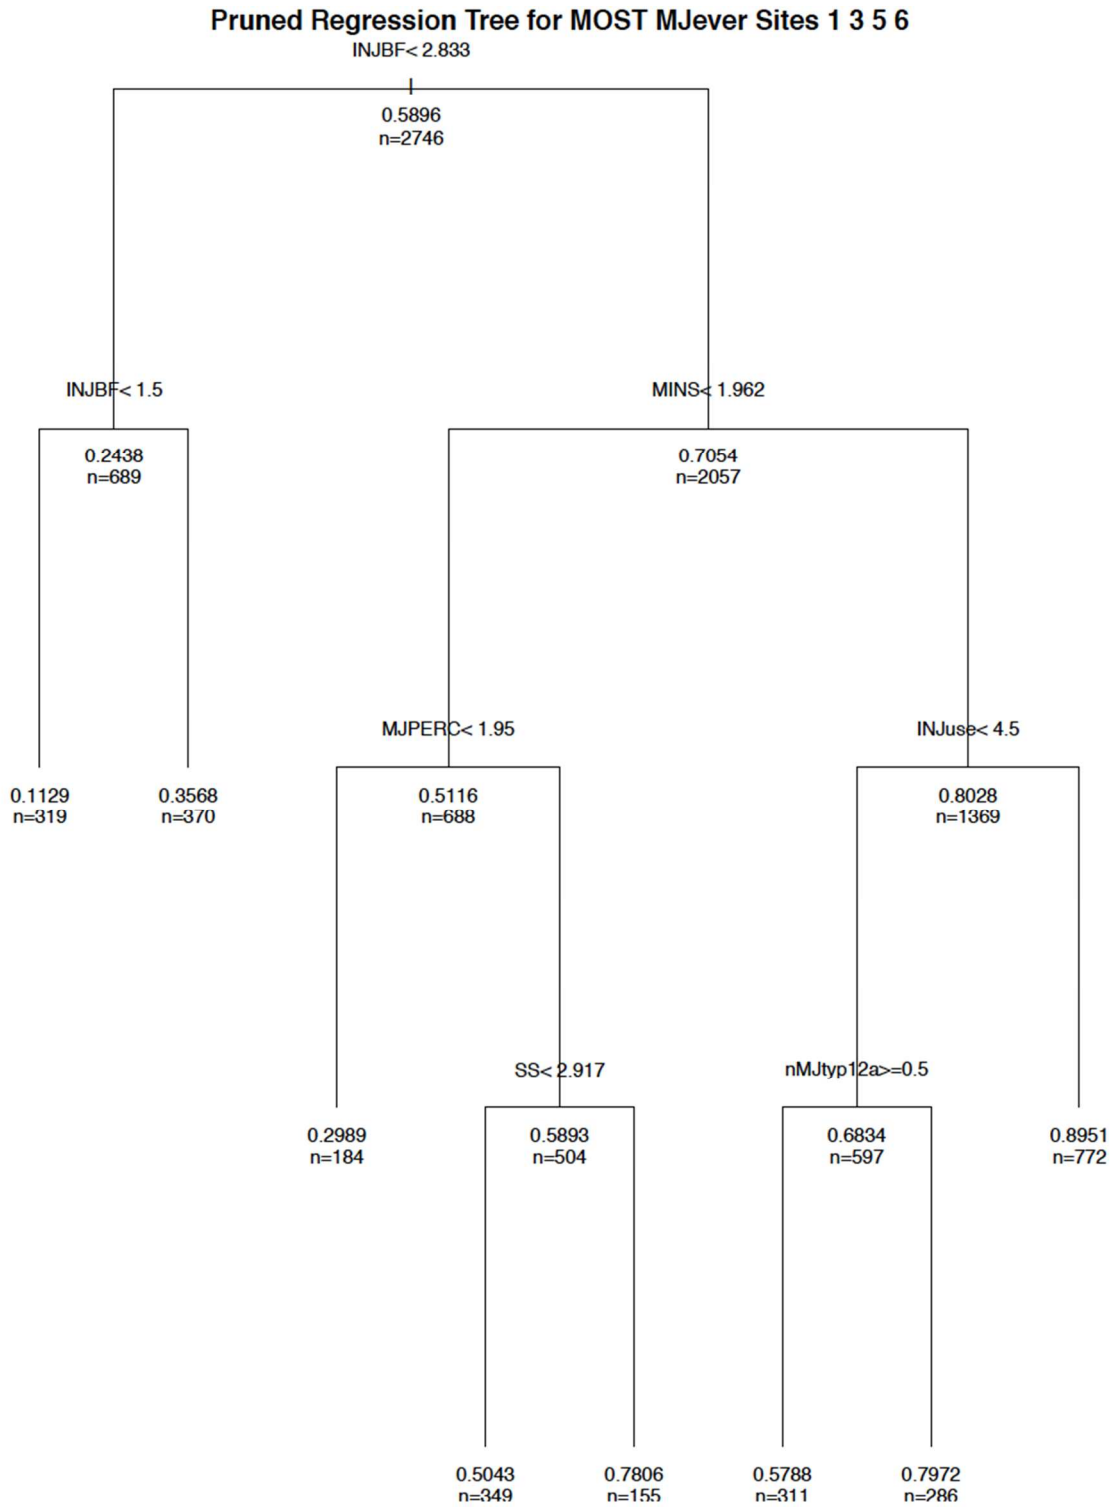

Figure B.

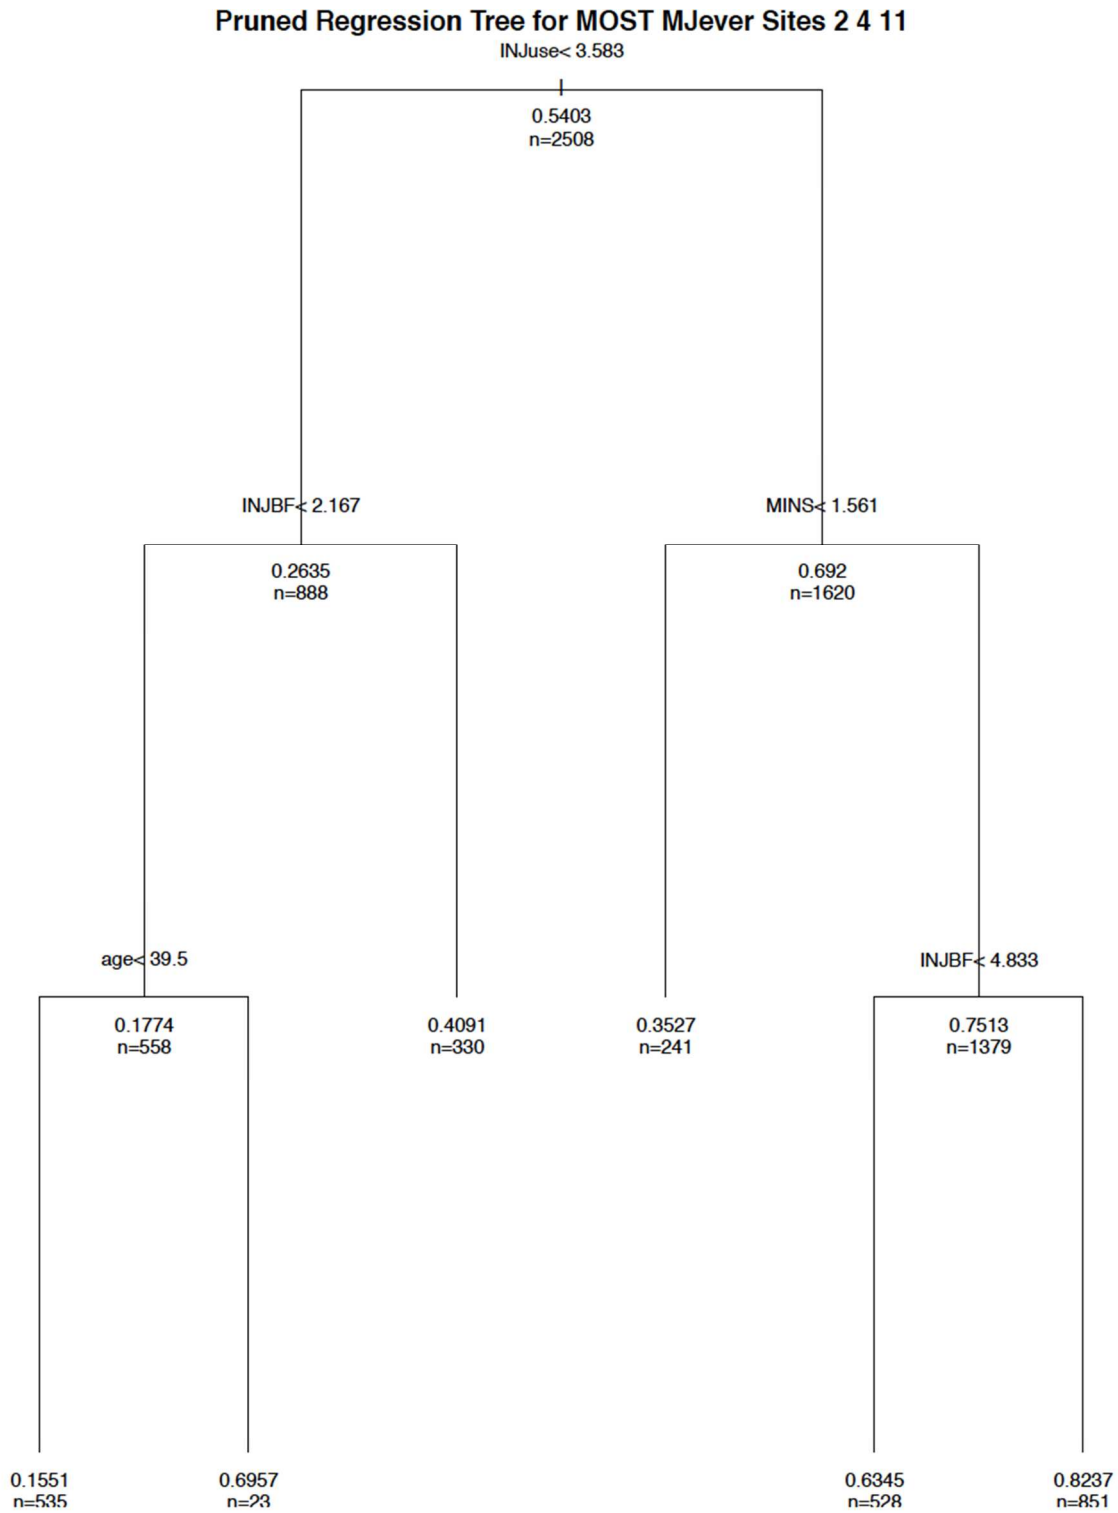

Figure C.

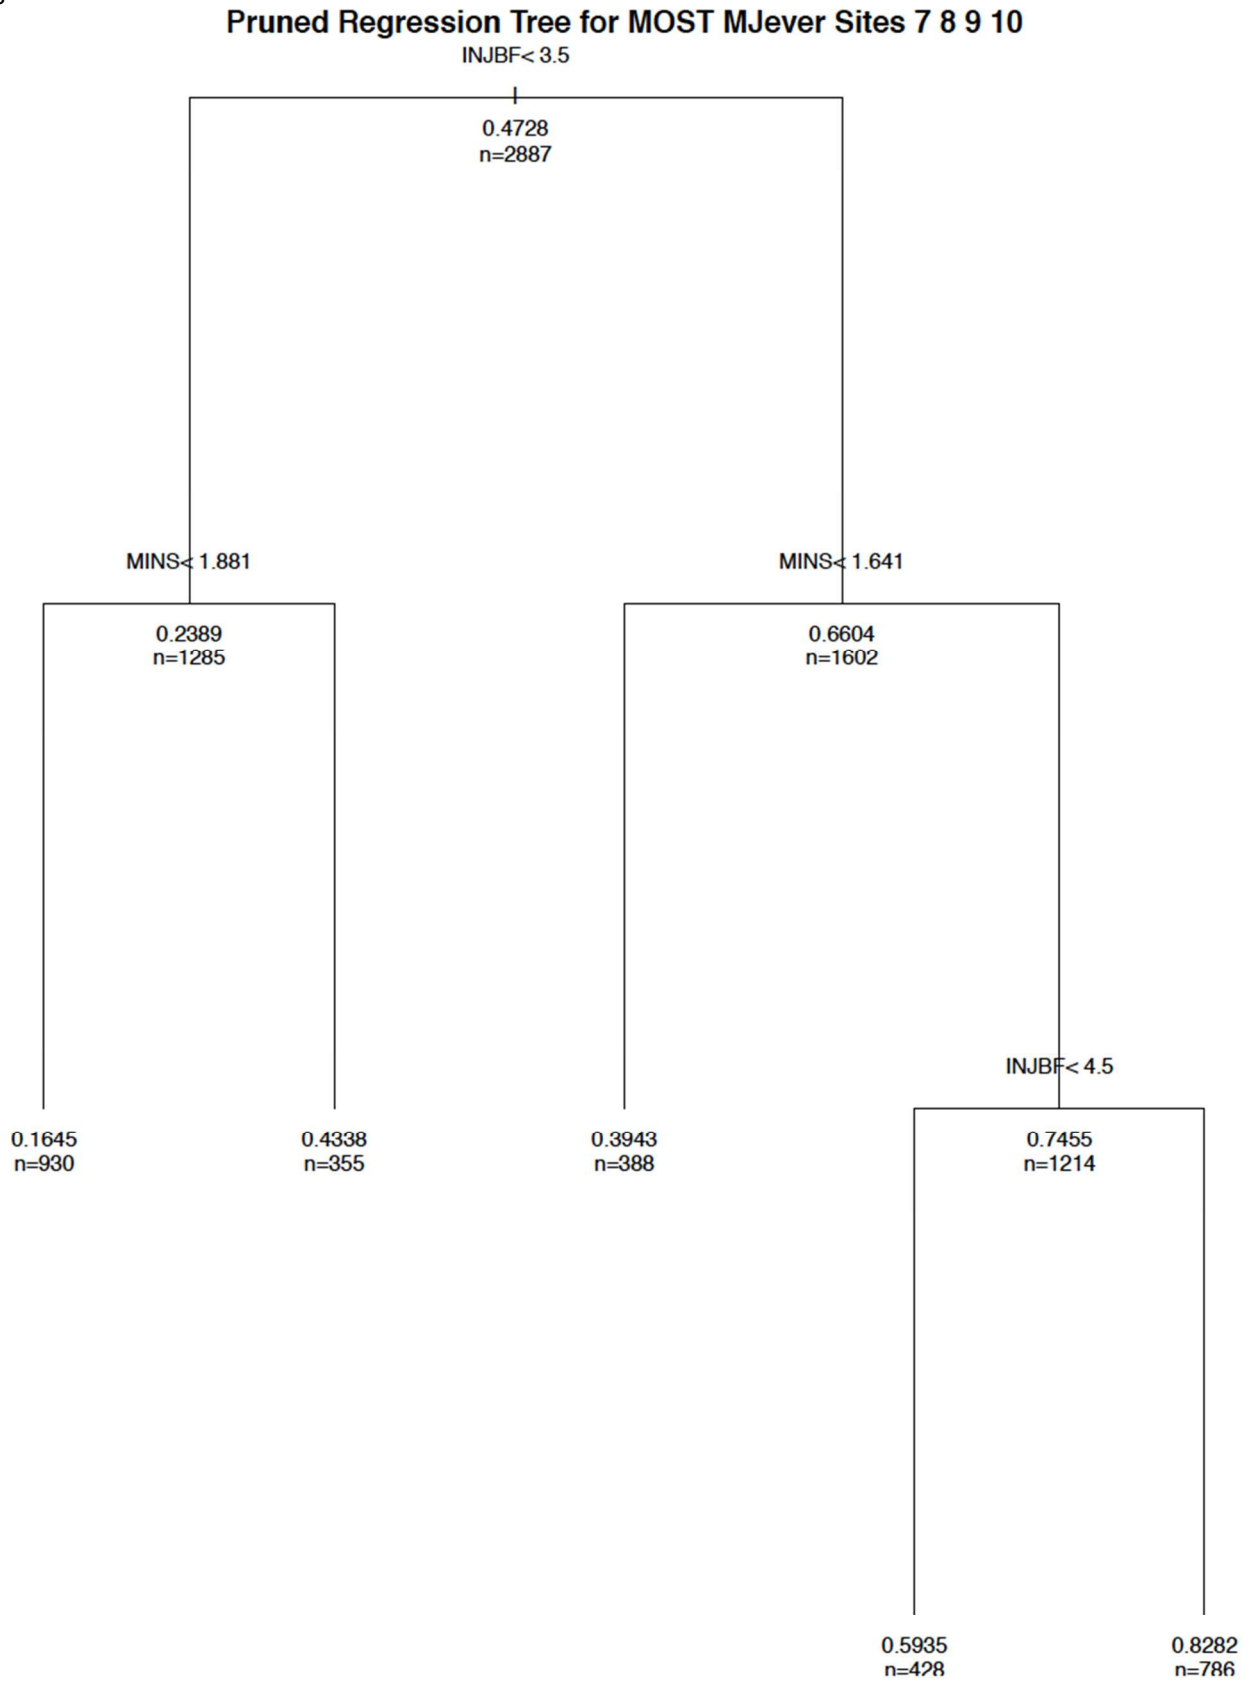

Figure D.

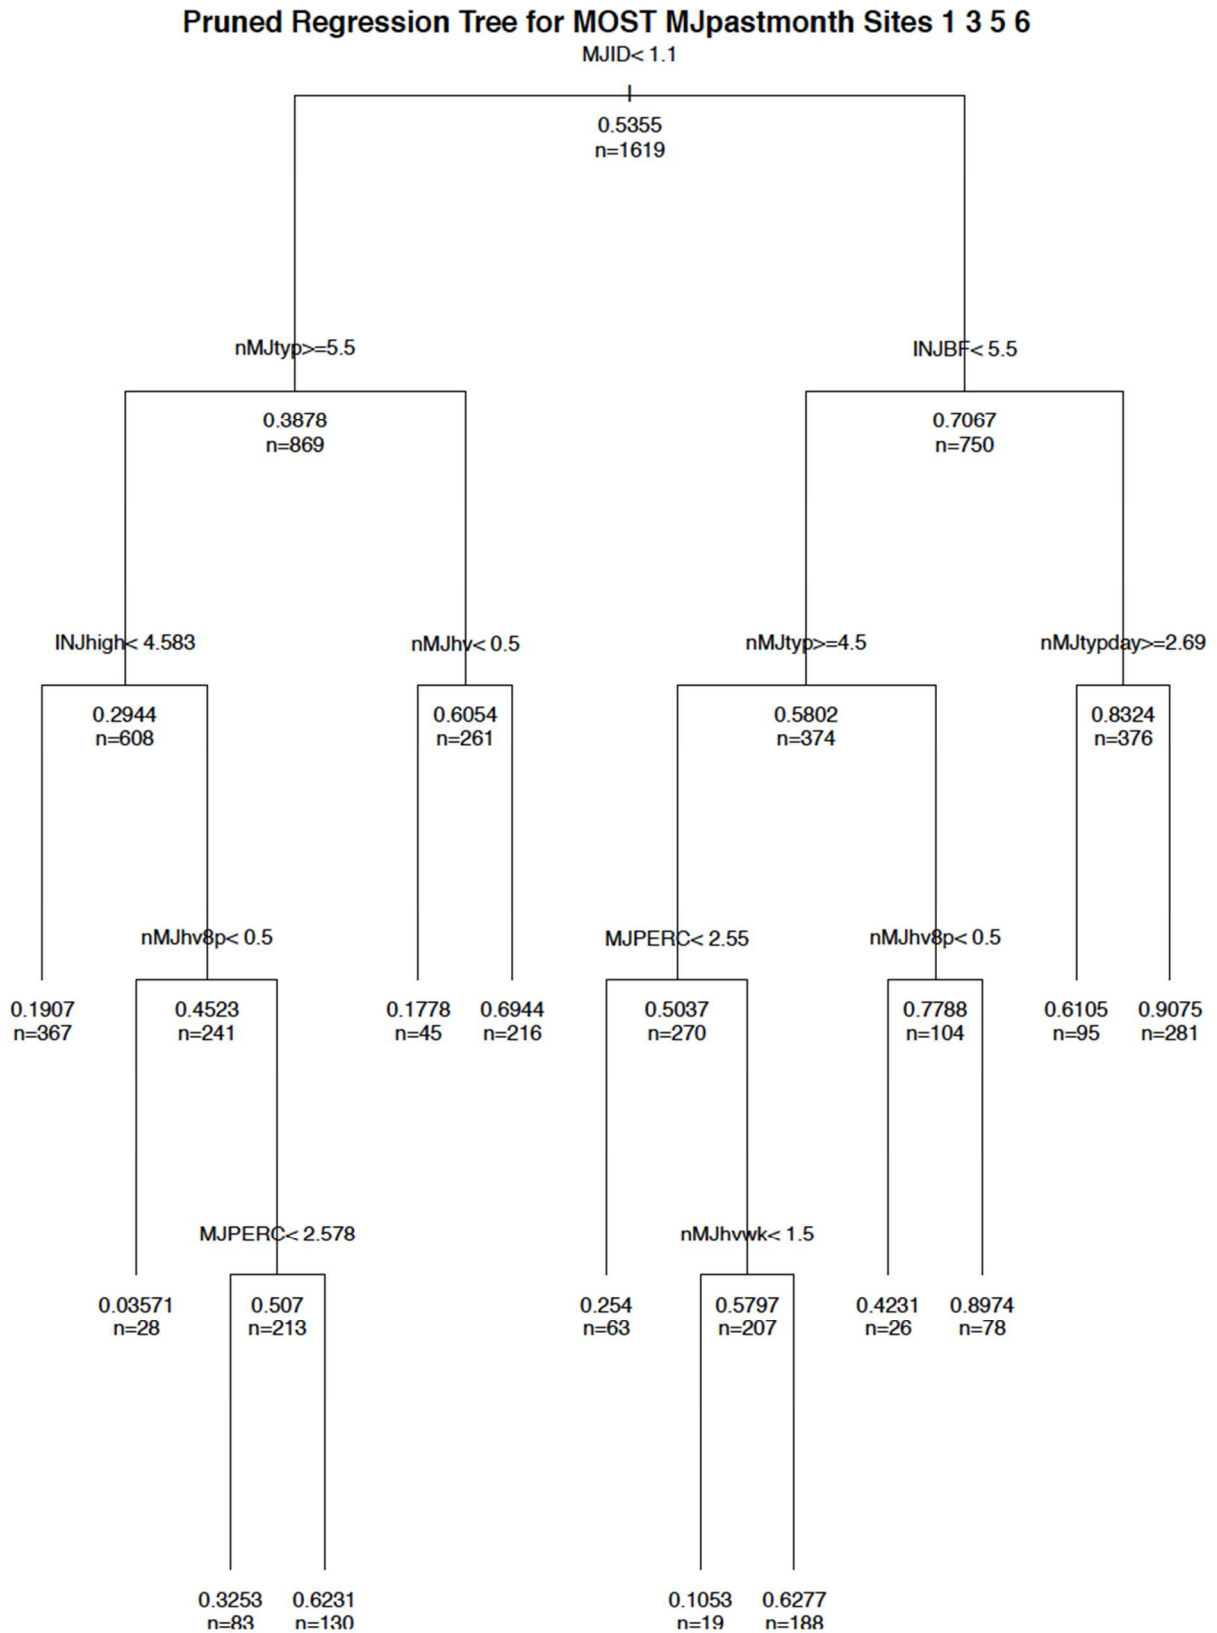

Figure E.

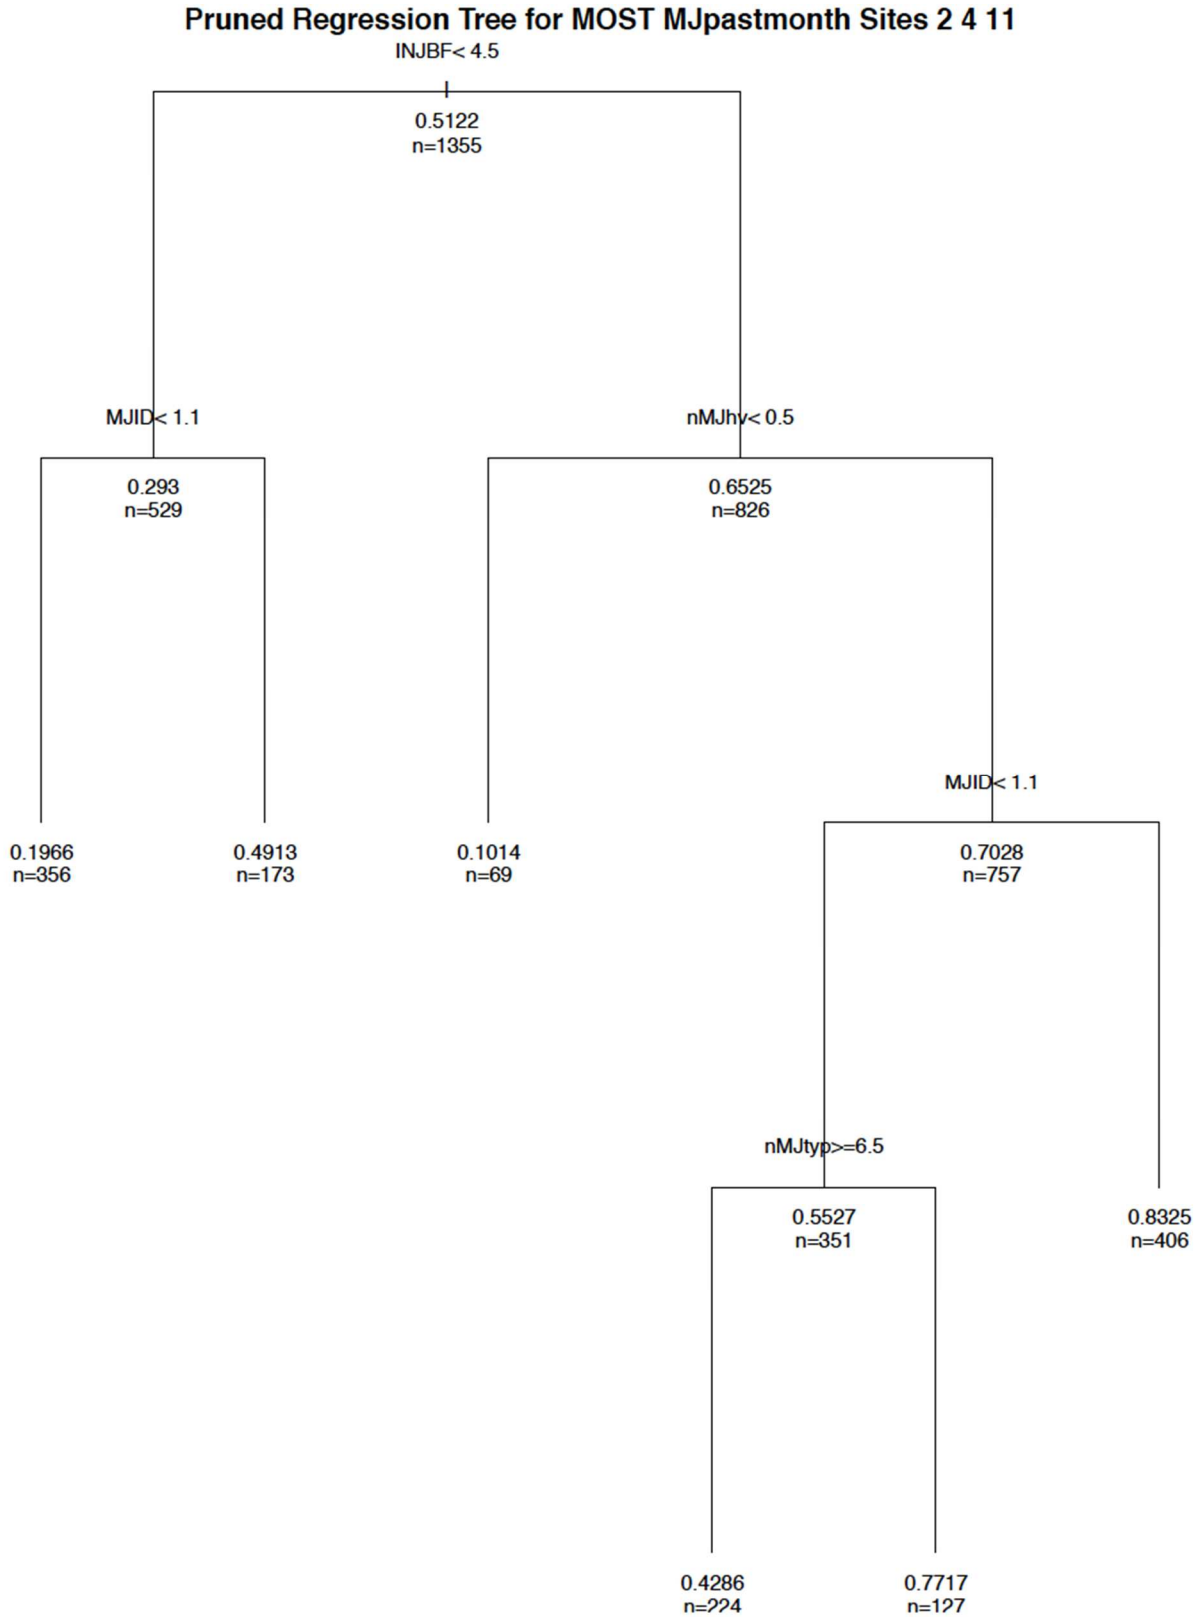





Figure F.

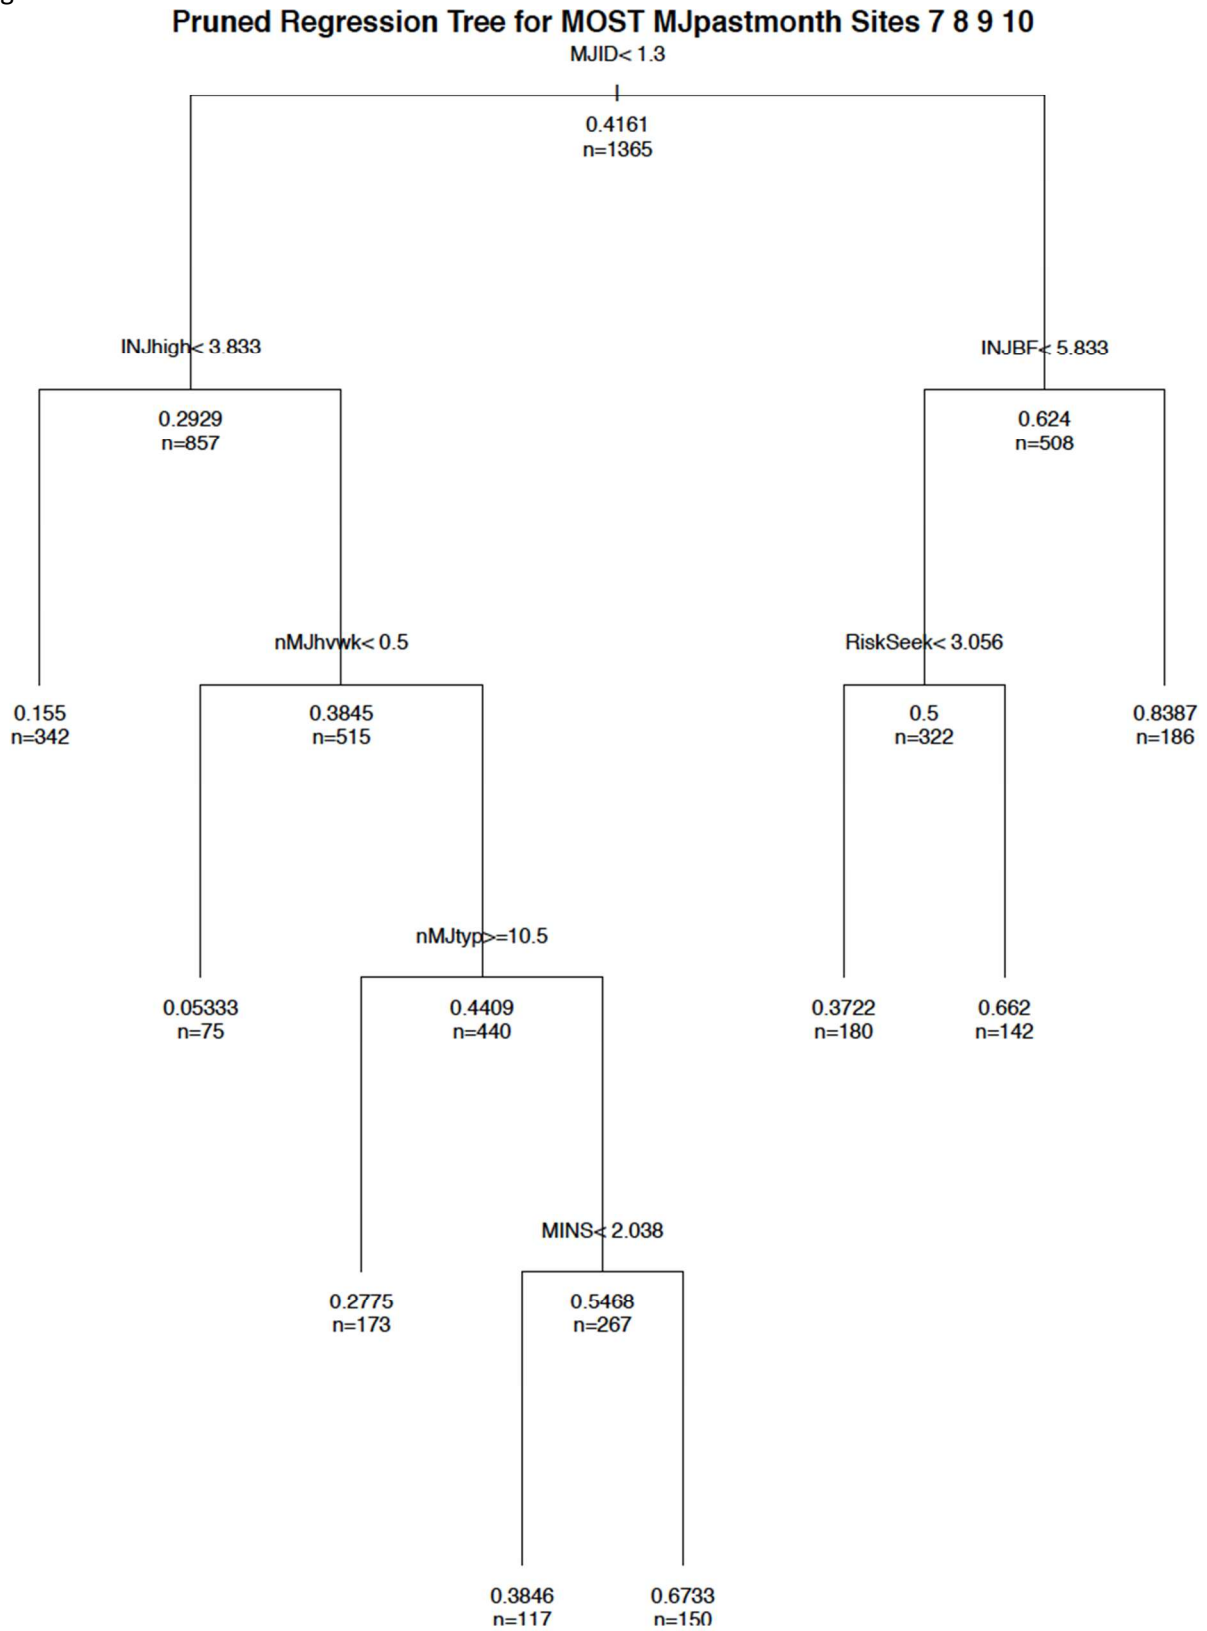



Figure G.

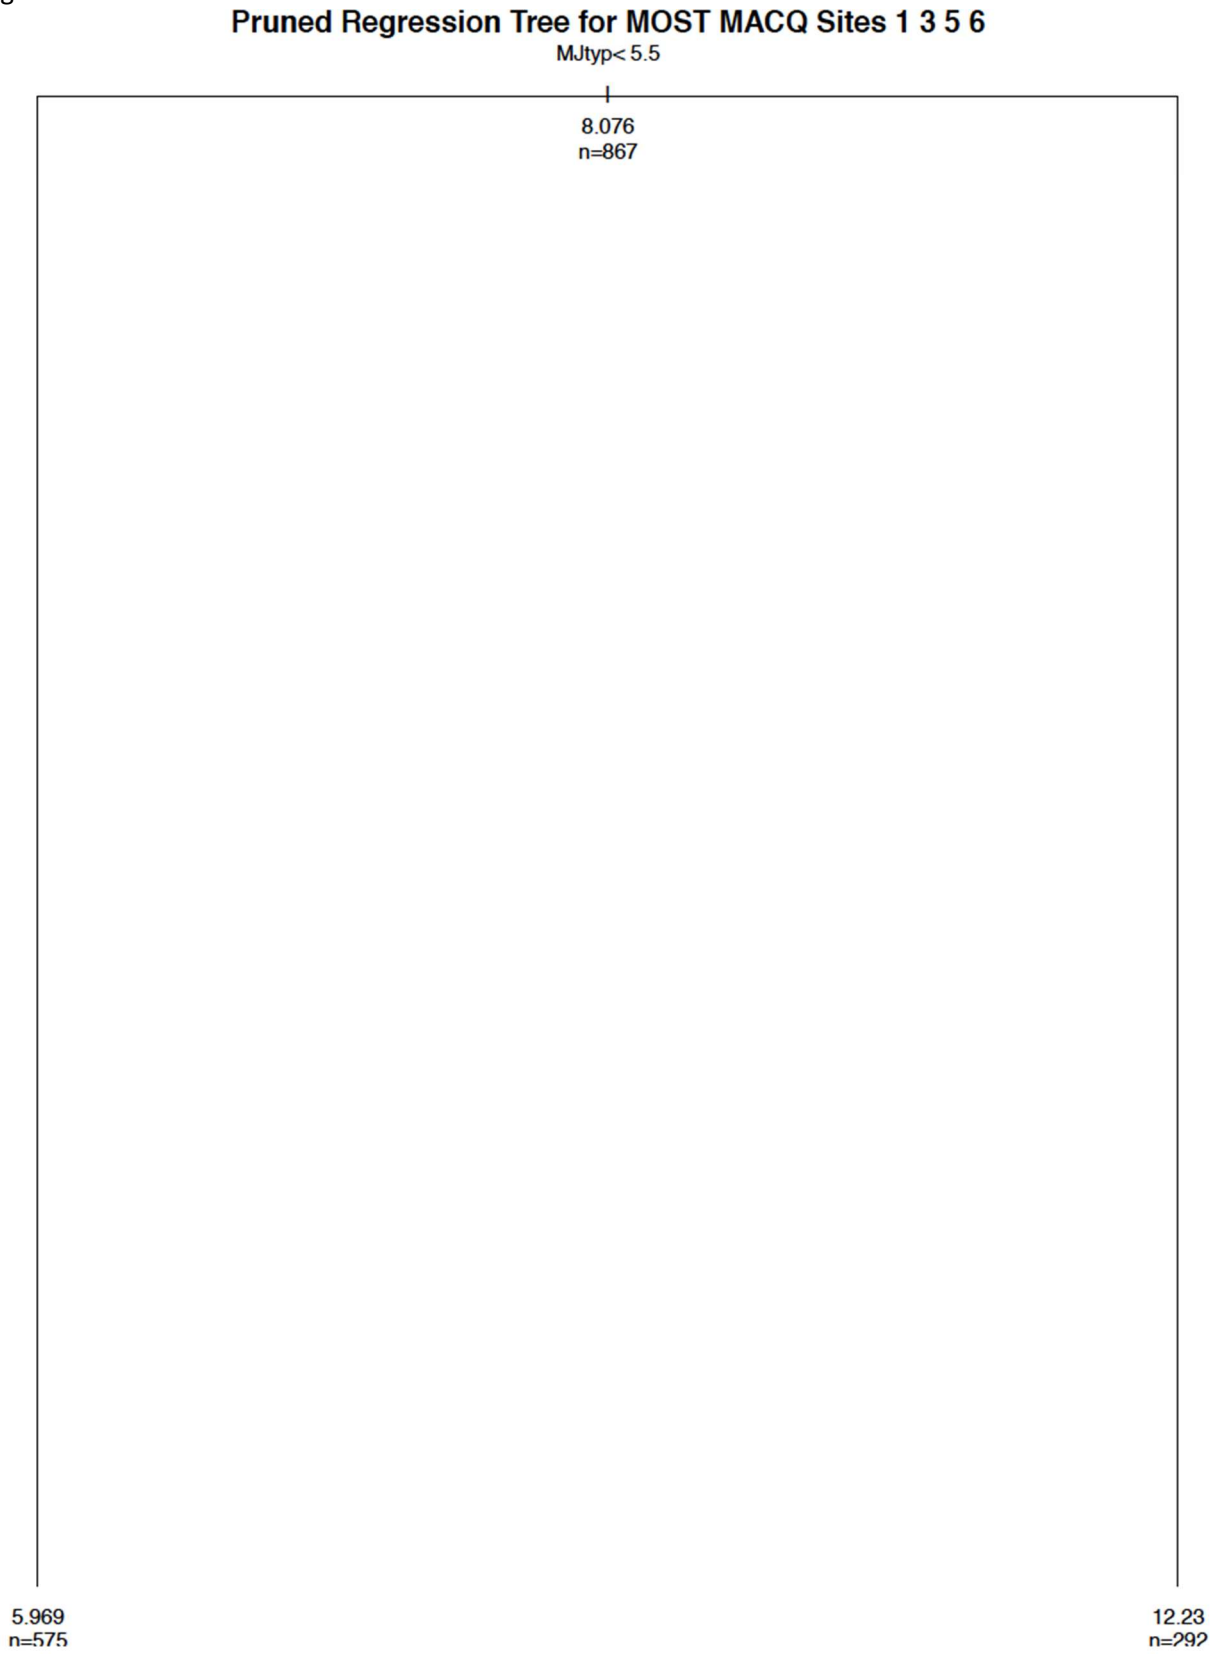

Supplement: NIHMS960932-supplement-1.pdf [file NIHMS960932-supplement-1.pdf]
